# Supplementary material for: Design of Double-Shelled CuS Nanocages to Optimize Electrocatalytic Dynamic for Sensitive Detection of Ascorbic Acid
Source: Nanoscale Res Lett. 2020 Feb 18;15:44. doi: 10.1186/s11671-020-3278-2 (PMC7028898; doi:10.1186/s11671-020-3278-2)
Supplement: Supplementary file 1 — Additional file 1: Figure S1. (a) FESEM image and (b) TEM image of 1-CuS NCs. Figure S2. (a) FESEM image of Cu2O. Figure S3. CVs of bare GCE at 50 mV s-1. Figure S4. CVs of 50 μM AA on 2-CuS NCs/GCE at different scan rates (16, 25, 36, 49, 64, 81 and 100 mV s-1). Figure S5. Chronoamperograms of (a) 2-CuS NCs/GCE and (b) 1-CuS NCs/GCE in the absence and presence of 0.5 mM AA; (c) Calibration curve of Icat versus t-1/2; (d) Calibration curve of Icat/IL versus t1/2. [file 11671_2020_3278_MOESM1_ESM.docx]

**Design of double-shelled CuS Nanocages to Optimize Electrocatalytic Dynamic for Sensitive Detection of Ascorbic Acid**

Tong Yang1,3,4, Liangliang Tian2,3,4*, Enmin Zhou5, Daidong Chen1,3,4 and Yu Lei 2,3,4*

1Faculty of Materials and Energy, Southwest University, Chongqing, PR China

2Research Institute for New Materials Technology, Chongqing University of Arts and Sciences, Chongqing, PR China

3Chongqing Key Laboratory of Materials Surface and Interface Science, Chongqing, PR China

4Chongqing Municipal Key Laboratory of Micro/Nano Materials Engineering and Technology, Chongqing, PR China

5School of Science, Chongqing University of Posts and Telecommunication, Chongqing, PR China

*Corresponding author.

E-mail addresses: tianll07@163.com (LL Tian)


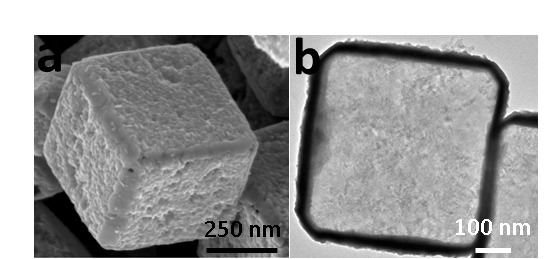


Fig. S1. (a) FESEM image and (b) TEM image of 1-CuS NCs.


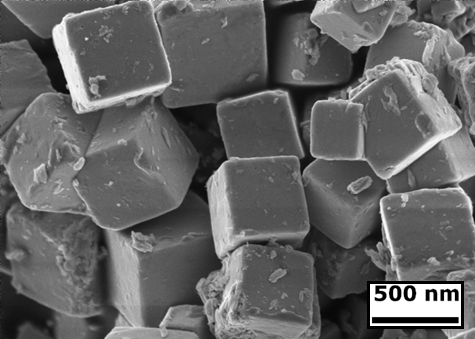


Fig. S2. (a) FESEM image of Cu2O


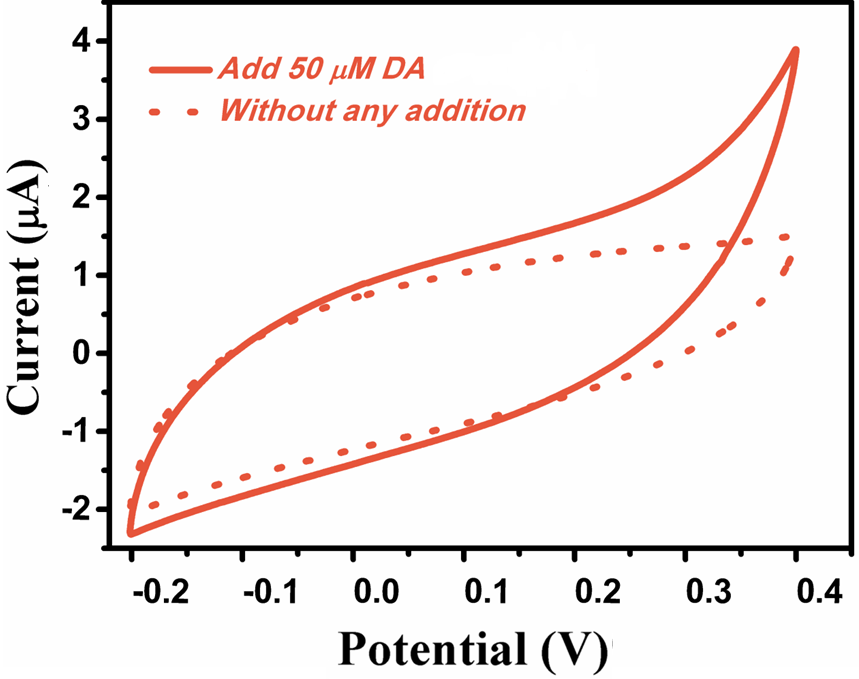


Fig. S3. CVs of bare GCE at 50 mV s-1.


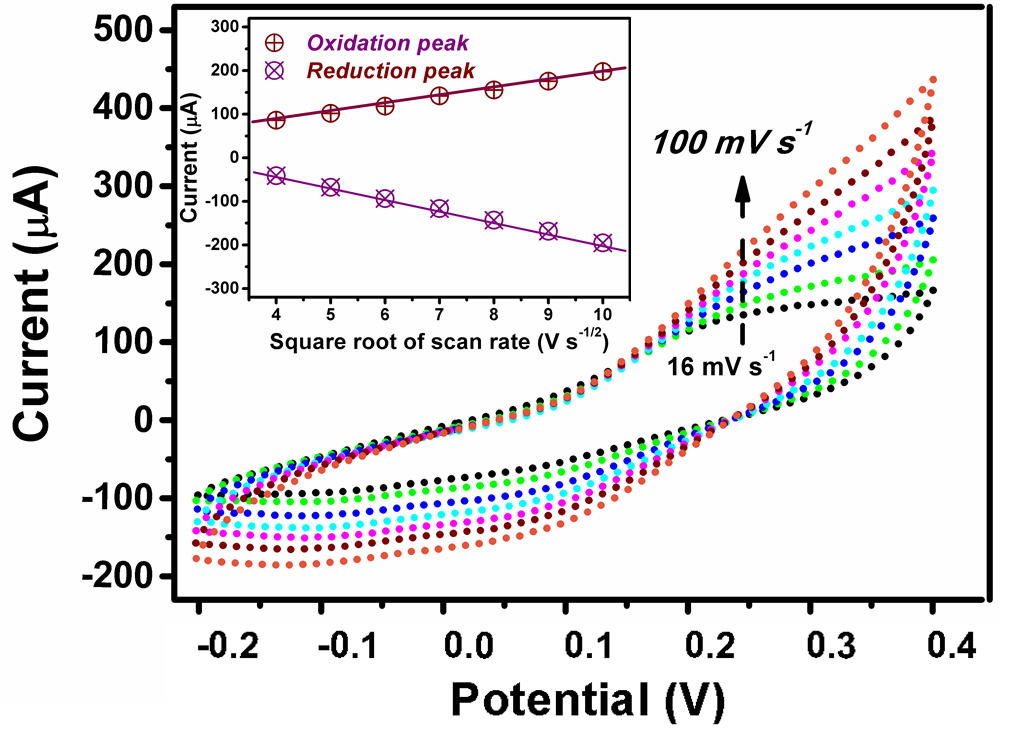


Fig. S4. CVs of 50 μM AA on 2-CuS NCs/GCE at different scan rates (16, 25, 36, 49, 64, 81 and 100 mV s-1)


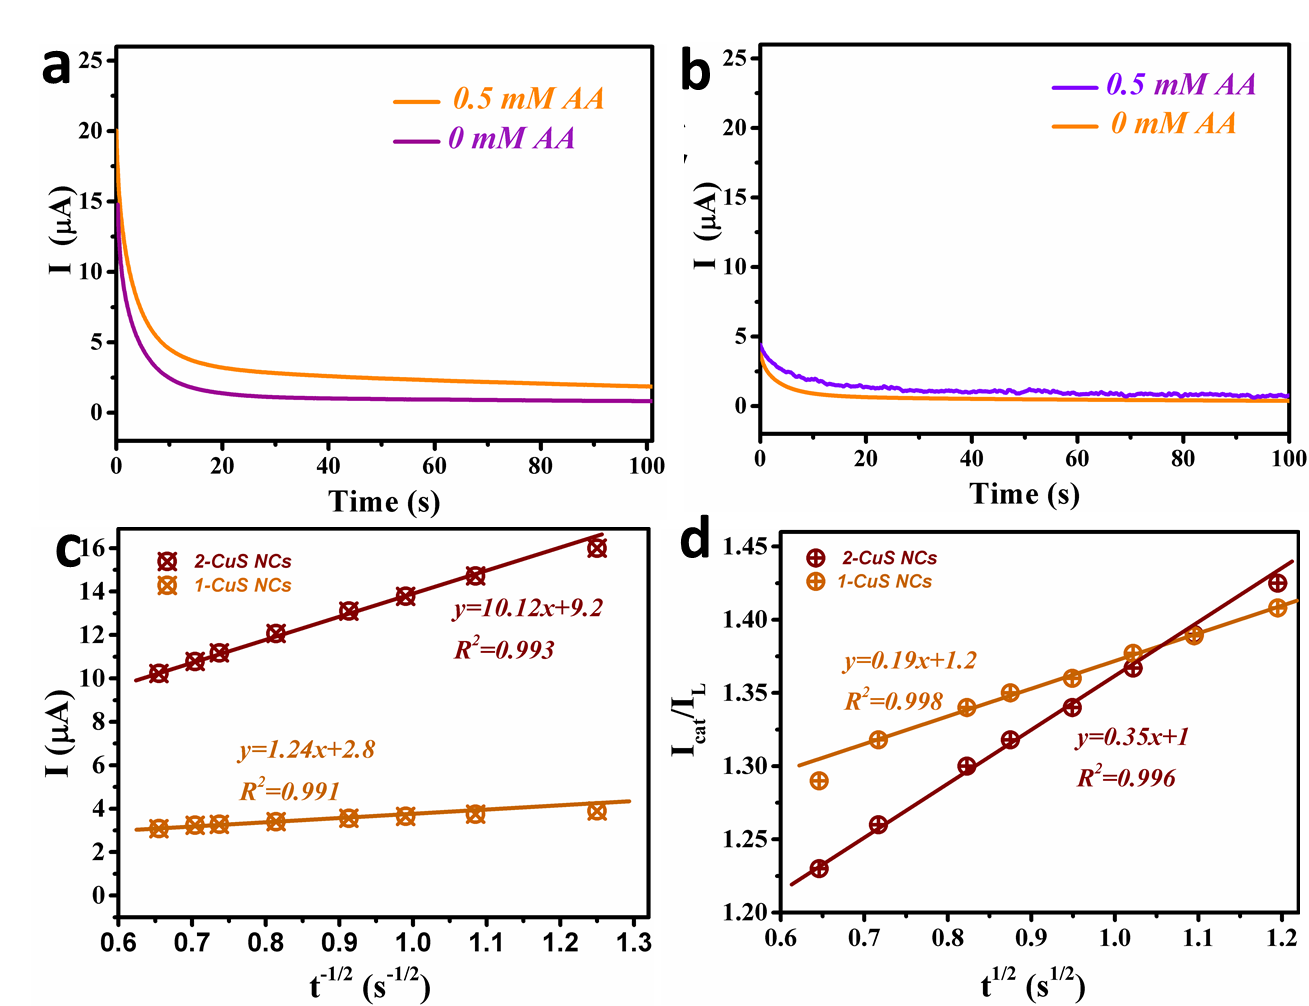


Fig. S5. Chronoamperograms of (a) 2-CuS NCs/GCE and (b) 1-CuS NCs/GCE in the absence and presence of 0.5 mM AA; (c) Calibration curve of *Ica*t versus *t-1/2*; (d) Calibration curve of *Icat/IL* versus *t1/2*.
